# Supplementary material for: Uptake of Biotin by Chlamydia Spp. through the Use of a Bacterial Transporter (BioY) and a Host-Cell Transporter (SMVT)
Source: PLoS One. 2012 Sep 27;7(9):e46052. doi: 10.1371/journal.pone.0046052 (PMC3459881; doi:10.1371/journal.pone.0046052)
Supplement: Table S1 — Biotin acquisition and utilization genes in obligate intracellular bacteria. (XLSX) [file pone.0046052.s010.xlsx]

## Sheet: Table S1.
	Biotin synthesis pathway								Transport	Biotin ligase
					Gene organization
Organism	bioF_2	bioA	bioD	bioB	Operon	Regulon	Dispersed	bioF_11	bioY	birA2
Chlamydia trachomatis 434/Bu	Absent							CTL01463a	CTL0613	CTL0094
Chlamydia muridarum Nigg	Absent							TC01583a	TC0638	TC0098
Chlamydia abortus LLG	CAB1_0705	CAB1_07064	CAB1_07075	CAB1_0704	+			CAB1_08313b	CAB1_0690	CAB1_0892
Chlamydia abortus S26/3	CAB686	CAB688	CAB687	CAB685	+			CAB8113b	CAB672	CAB869
Chlamydia psittaci 6BC	CPSIT_0763	CPSIT_0765	CPSIT_0764	CPSIT_0762	+			not annotated3b, 6	CPSIT_0748	CPSIT_0955
Chlamydia caviae GPIC	Absent							CCA008463b	CCA00706	CCA00901
Chlamydia felis Fe/C-56	CF0297	CF0295	CF0296	CF0298	+			CF01703b	CF0309	CF0113
Chlamydia pecorum E58	G5S_1099	G5S_1101	G5S_1100	G5S_1098				G5S_01093a	Absent	G5S_0175
Chlamydia pneumoniae TW-183	CpB1083	CpB1081	CpB1082	CpB1084	+			CpB09563a	Absent	CpB0894
Simkania negevensis Z	Absent							SNE_A04320	SNE_A03120/SNE_A064407	SNE_A03160
Waddlia chondrophila WSU 86-1044	Absent							wcw_1564/hemA	wcw_1761	wcw_0301
Parachlamydia acanthamoebae UV-7	PUV_13510	PUV_13560	PUV_13550	PUV_15830			+	PUV_11820/kbl	PUV_27580	PUV_06570
Protochlamydia amoebophila UWE25	Absent							pc0811	pc1823	pc0165
Rickettsia prowazekii str. Madrid E	Absent							RP841	RP324	RP533
Coxiella burnetii RSA 4938	CBU_1006	CBU_1008	CBU_1003	CBU_1007		+		CBU_1966/hemA	Absent	CBU_1002
Ehrlichia chaffeenis str. Arkansas	ECH_0950	ECH_0666	ECH_1110	ECH_0352			+	ECH_0092/hemA	Absent	ECH_0848
Wolbachia pipientis wMel	Absent							WD1279/hemA	WD1206	WD0970
1The bioF_1/hemA annotations are based on an aspartate aminotransferase (AAT) superfamily (type I) fold found in pyridoxal phosphate (PLP)-dependent enzymes.
2With the exception of Coxiella, these species express a Class I BirA (lacking the N-terminal helix-turn-helix motif of Class II proteins known to regulate biotin gene expression).
3aThe bioF_1 in these species converges with priA resulting in the overlap of the 3' ends of the respective ORFs. Genome annotations for these ORFs start with TTG (leu) instead of ATG (met).
3bThe bioF_1 in these species converges with priA resulting in the overlap of the 3' ends of the respective ORFs. Genome annotations for these ORFs start with ATG (met).
4CAB688 in C. abortus LLG encodes a truncated BioA (a frameshift mutation resulting in the absence of 93 amino acids compared to the BioA from C. abortus S26/3).
5CAB687 in C. abortus LLG encodes a truncated BioD (29 amino acids, 207 amino acids in S26/3) owing to a nonsense codon at position 30.
6bioF_1 is present (and convergent with priA), but is not annotated in C. psittaci 6BC.
7Two putative bioY genes are annotated in S. negevensis Z.
8Coxiella encodes bioA, bioB, bioF, bioH, bioC, and bioD in a putative regulon.
