# Supplementary material for: Uptake of Biotin by Chlamydia Spp. through the Use of a Bacterial Transporter (BioY) and a Host-Cell Transporter (SMVT)
Source: PLoS One. 2012 Sep 27;7(9):e46052. doi: 10.1371/journal.pone.0046052 (PMC3459881; doi:10.1371/journal.pone.0046052)
Supplement: Table S3 — List of cell lines and bacterial strains used in this study. (XLSX) [file pone.0046052.s012.xlsx]

## Sheet: Table S3.
Cell Line	Description	Source (Ref)
L2	mouse fibroblast	(84)
HeLa USU	human cervical epithelial	(85)
McCoy	mouse fibroblast	ATCC, CRL-1696
HEp-2	human, epithelial	ATCC, CCL-23
Bacteria	Description
DH5α	Escherichia coli used for routine cloning
C43(DE3)	E. coli used for protein expression (Lucigen)
ATM1135	E. coli C43(DE3), pET19b; this study
ATM1172	E. coli C43(DE3), pET19b::bioY::His-tag; this study
ATM1173	E. coli C43(DE3), pET19b::bioY (no His-tag); this study
ACE032	Chlamydia psittaci 6BC (clonal, BCRB)
ACE051	Chlamydia trachomatis 434/Bu serovar L2 (clonal CtL2NA)
ACE069	Chlamydia caviae GPIC (clonal SP6)
ACE099	Chlamydia muridarum Nigg (clonal MoPnNA)
ACE106	Chlamydia trachomatis serovar D (clonal CtDNA)
ACE107	Chlamydia trachomatis serovar E (clonal CtENA)
ACE108	Chlamydia trachomatis serovar A (clonal CtAREF)
ACE110	Chlamydia pneumoniae TWAR
